# Supplementary material for: Multi-genome comparisons reveal gain-and-loss evolution of the anti-Mullerian hormone receptor type 2 gene, an old master sex determining gene, in Percidae
Source: PubMed Central journal article supplement — bioRxiv. 2023 Nov 16:2023.11.13.566804. Preprint. [Version 2] doi: 10.1101/2023.11.13.566804 (PMC10680665; doi:10.1101/2023.11.13.566804), 2023-11-16
Supplement: NIHPP2023.11.13.566804v2-supplement-1.pdf [file NIHPP2023.11.13.566804v2-supplement-1.pdf]

598 **Supplementary figures**

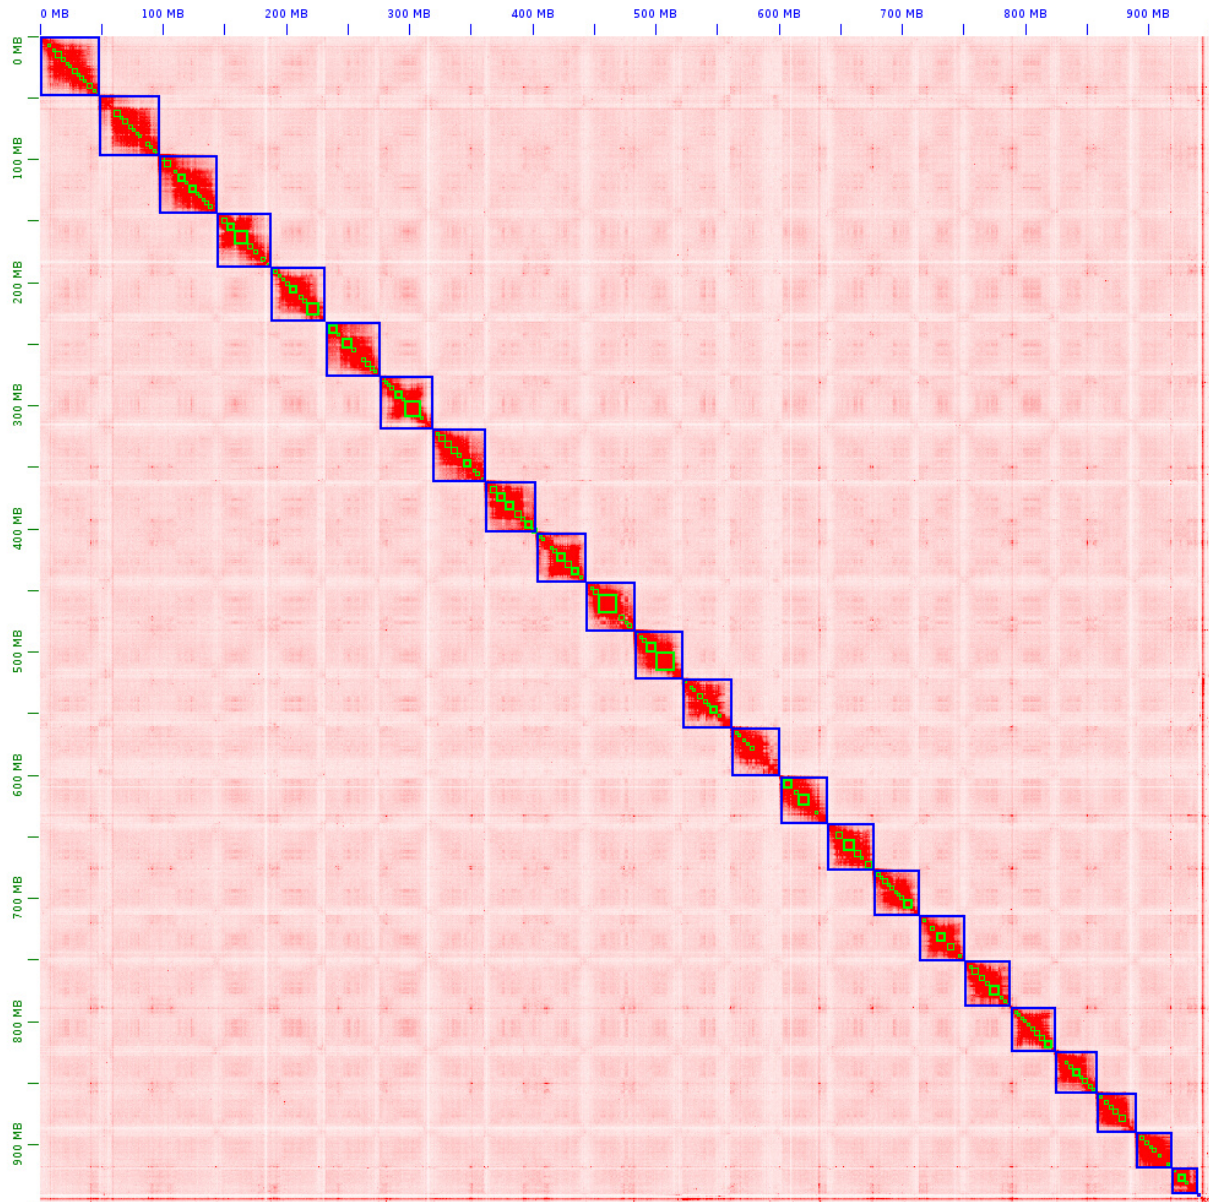

599

600 **Supplementary Figure 1: Hi-C map of *P. fluvialis* genome.**

601

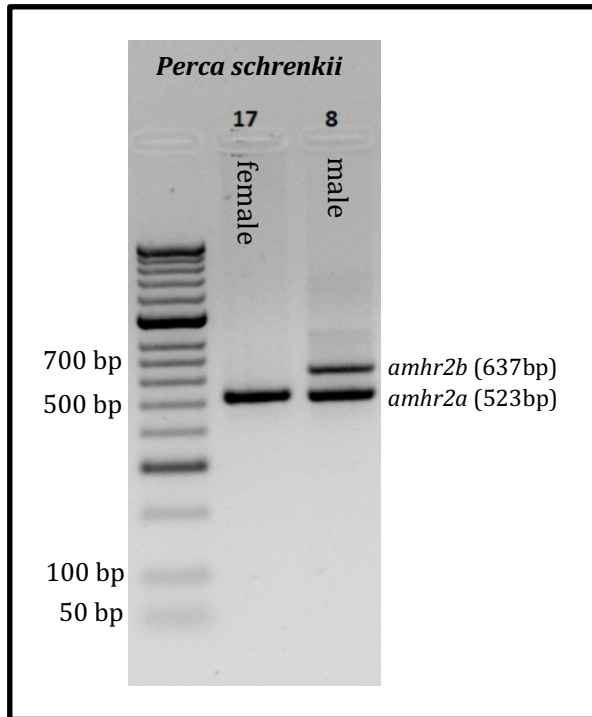

602

603 **Supplementary Figure 2:** A sex-specific 637 bp PCR product amplifies in *P. schrenkii* male (sample  
604 id = 8), while it is absent in female (sample id = 17). The corresponding primer pair also works for sexing  
605 of *P. flavescens*.

606

607

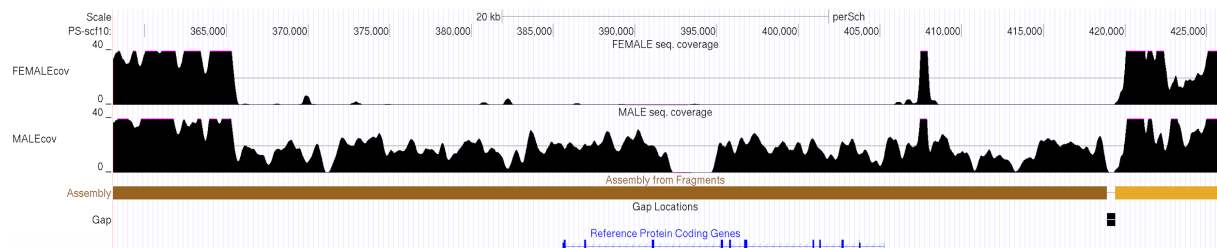

608

609 **Supplementary Figure 3:** Sex-specific sequencing coverage of *amhr2b* locus in *Perca schrenkii* in region  
610 PS-scf10 / CM046795.1: 366,025-418,970. A female and a male genome were sequenced to  
611 approximately 40x coverage using short-read sequencing. After filtering for unique mapping reads  
612 (mapping quality 60), a clear coverage difference between females and males is visible. The ~53 kbp  
613 region has virtually no coverage in females. In contrast males exhibit haploid coverage (about 20x),  
614 which is in accordance with a X/Y SD system.

615

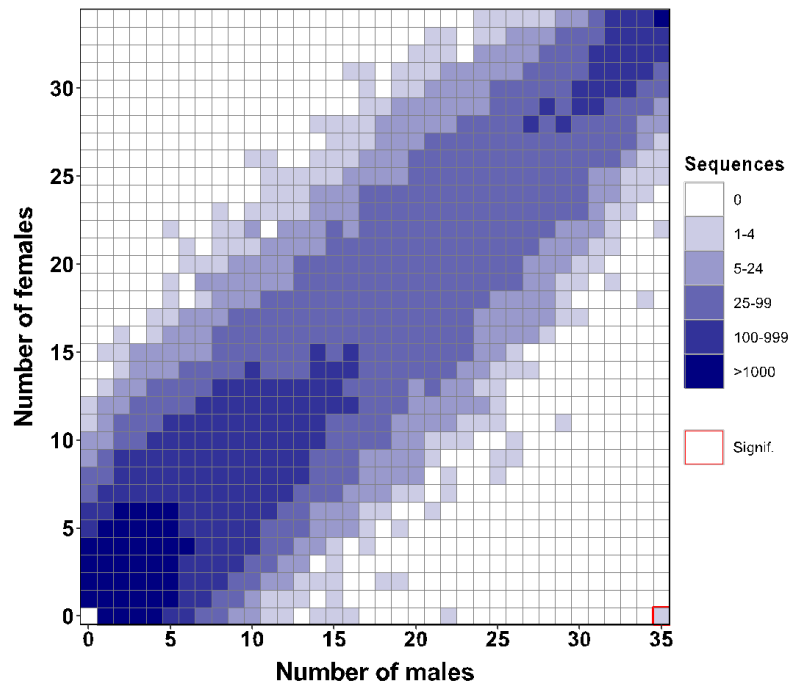

616

617 **Supplementary Figure 4: A single RAD sex-specific marker is significantly associated with male sex in**  
 618 ***P. fluviatilis*.** Tile plot of the distribution of RADSex markers between *Perca fluviatilis* males (horizontal  
 619 axis) and females (vertical axis) with a minimum read depth of 1 ( $d = 1$ ). Color intensity (see color  
 620 legend on the right) indicates the number of markers present for each of the corresponding number  
 621 of males and females. A single significant marker at the lower right of the grid was present in all 35  
 622 males and absent from all 34 females and is boxed with a red border (Chi-squared test,  $p < .05$  after  
 623 Bonferroni correction).

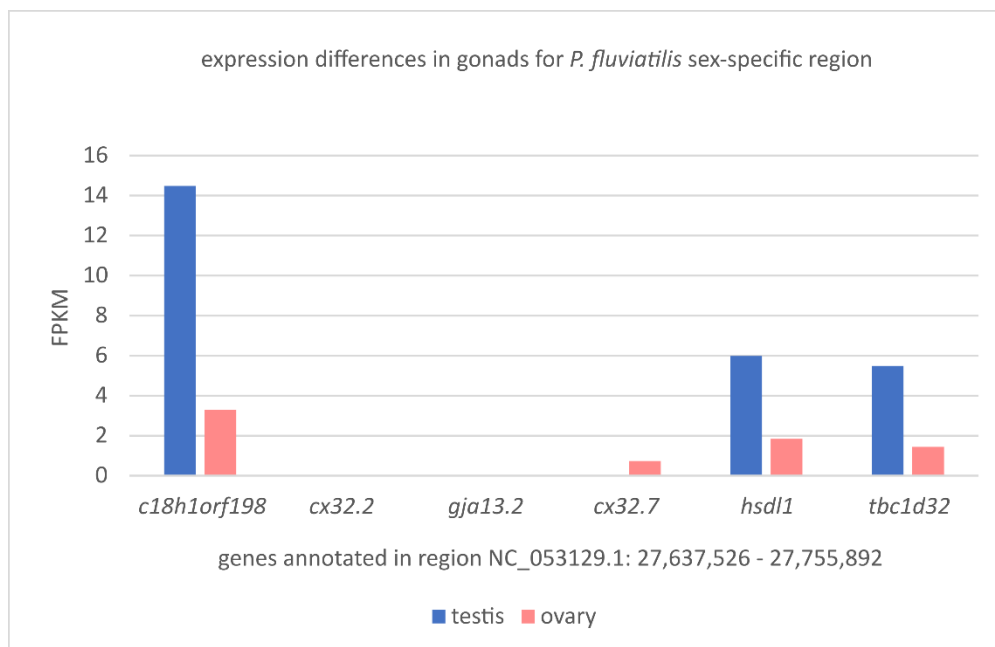

624

625 **Supplementary Figure 5: Expression of *hsd1* and neighboring genes in public RNAseq datasets (testis:**  
 626 **SRR14461526, ovary: SRR14461527; age of both sampled individuals 9 month).** Here *hsd1* expression  
 627 in testis is 3.25-fold higher than in ovary, for *tbc1d32* and *c18h1orf198* the ratio is 3.83 and 4.41,  
 628 respectively.

629

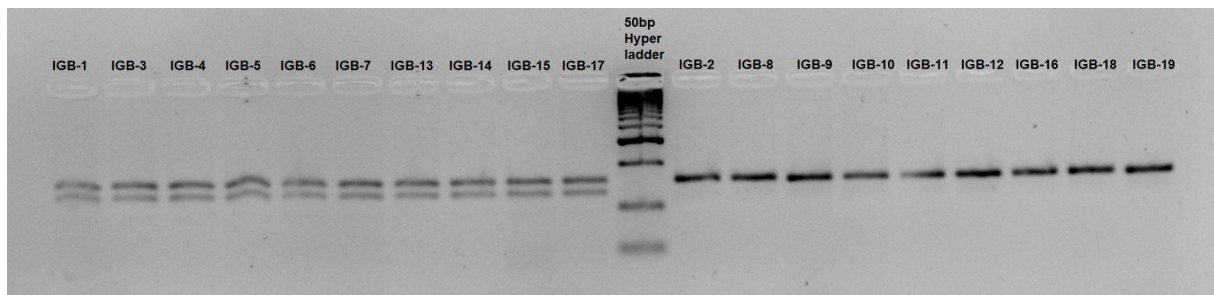

630

631 **Supplementary Figure 6: Sexing of *P. fluviatilis* using a 27 bp male specific deletion in Intron 3 of the *hsdI1* gene**  
632 (10 males (left) and 9 females (right) from Lake Mueggelsee, Berlin. The simultaneous amplification in both males  
633 and females of the X allele without the 27 bp deletion provides an internal control for this PCR. All XY male  
634 samples (N = 10) produce two amplicons due to the small size difference of the X and Y amplified alleles, and all  
635 XX females (N = 9) produced only the larger X amplicon. This *hsdI1* intronic indel variant is located near the variant  
636 SNV5 (distance < 1.5 kbp).

637

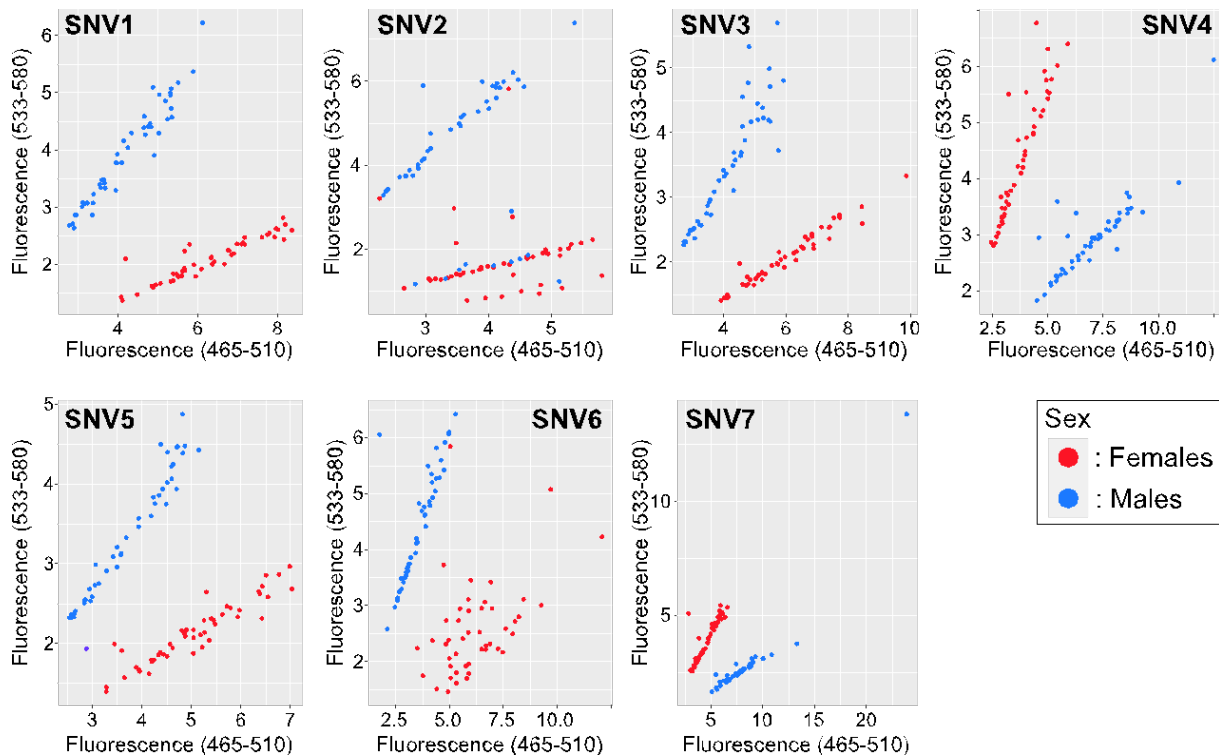

638

639 **Supplementary Figure 7: KASpar allele-specific PCR assays on seven single sex-specific nucleotide**  
640 **variations (SNV ID#) in *P. fluviatilis*.** For each Single Nucleotide Variation (SNV), primer AL1 was  
641 coupled to FAM fluorescent dye and primer AL2 was coupled to VIC fluorescent dye and the end-point  
642 fluorescence of these two fluorescent dyes was respectively on the x- and y- axes. Male individuals are  
643 represented by blue dots and females by red dots. Primers used for analysis can be found in Table 1.

644

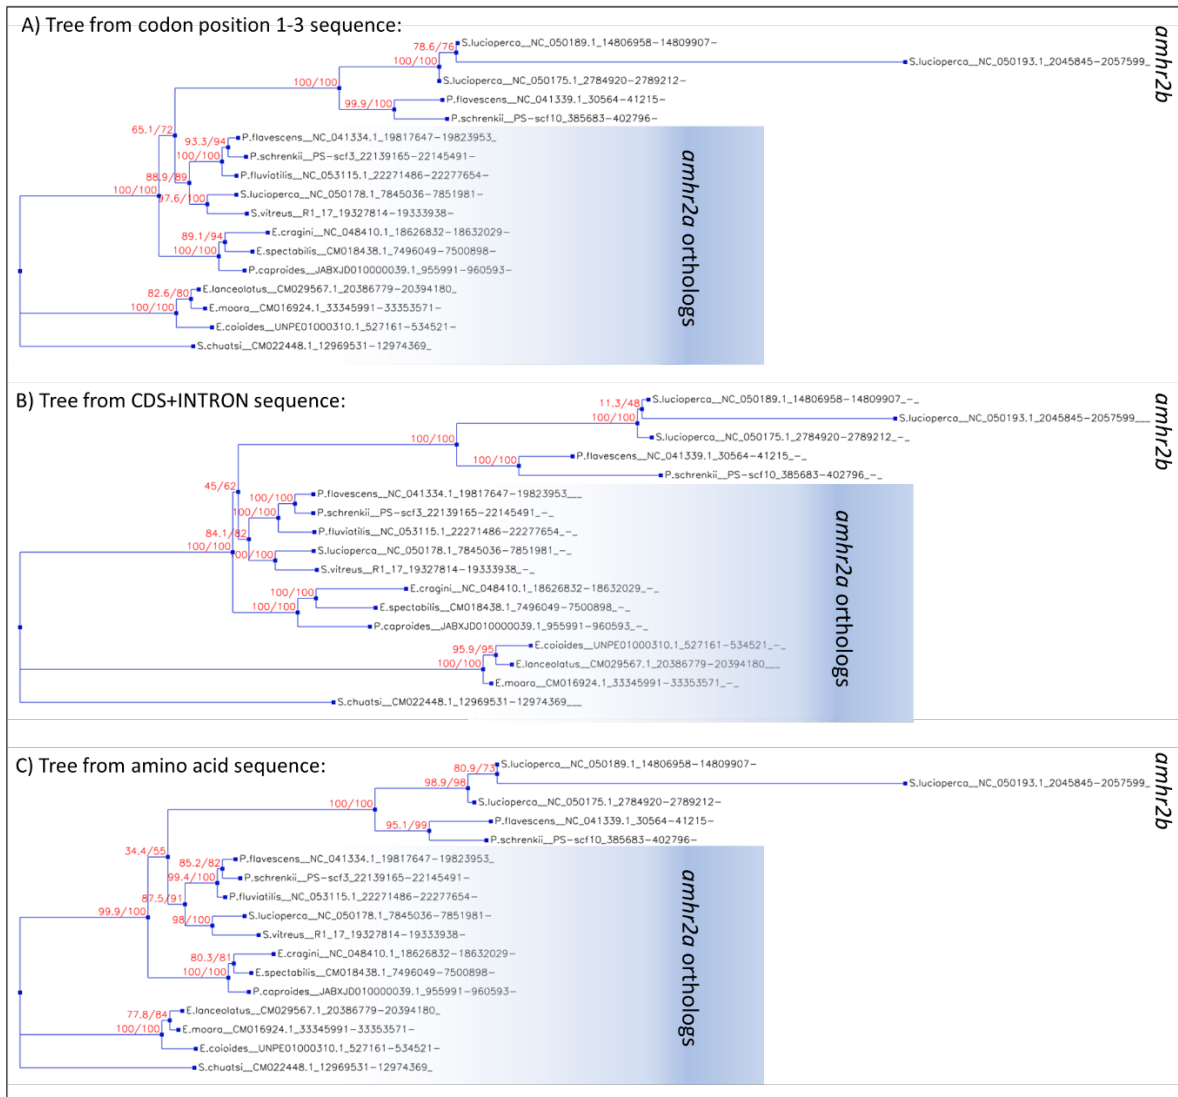

645

646 **Supplementary Figure 8:** Additional gene trees for *amhr2*. A) Tree calculated from coding sequence.  
 647 B) Tree calculated from coding plus intron sequence. C) Tree calculated from amino acid sequence.  
 648 All trees share the same topology but differ in support values for some splits (SH-aLRT and UFBS  
 649 tests).



676 **Supplementary Table 1:** Annotated repeats in *Perca sp.* and *Sander sp.* genomes (RepeatModeler *de*  
677 *novo* analysis). Repeat elements mentioned in the manuscript have grey highlighting. The class “DNA”  
678 is assigned to repeat elements that harbor signals of transposases, but miss further signals to classify  
679 them with more detail.

|                         | <i>P. fluviatilis</i> | <i>P. flavescens</i> | <i>P. schrenkii</i> | <i>S. lucioperca</i> | <i>S. vitreus</i> |
|-------------------------|-----------------------|----------------------|---------------------|----------------------|-------------------|
| <b>length (no gaps)</b> | 951.053.269           | 877.041.836          | 893.440.234         | 901.028.039          | 785.350.625       |
| <b>Repeat class</b>     | <b>bp masked</b>      | <b>bp masked</b>     | <b>bp masked</b>    | <b>bp masked</b>     | <b>bp masked</b>  |
| DNA                     | <b>22.711.613</b>     | 20.520.179           | <b>23.132.743</b>   | <b>19.957.261</b>    | 15.428.015        |
| Academ                  | 2.340.071             | 1.619.886            | 1.842.836           | 2.412.073            | 1.790.843         |
| CMC-Chapaev-3           | 230.562               | 0                    | 0                   | 0                    | 0                 |
| CMC-EnSpm               | <b>9.118.071</b>      | 7.588.794            | <b>4.039.674</b>    | <b>5.928.087</b>     | 3.520.268         |
| Crypton                 | 841.031               | 547.307              | 748.707             | 772.498              | 402.911           |
| Crypton-V               | 11.212                | 0                    | 0                   | 0                    | 0                 |
| Dada                    | 0                     | 33.030               | 206.119             | 0                    | 0                 |
| Ginger                  | 0                     | 15.288               | 0                   | 0                    | 0                 |
| IS3EU                   | 1.282.033             | 531.773              | 496.067             | 288.665              | 509.614           |
| Kolobok-Hydra           | 0                     | 648.047              | 0                   | 0                    | 70.720            |
| Kolobok-T2              | 1.252.506             | 1.976.511            | 2.668.034           | 1.586.132            | 1.222.046         |
| MULE-MuDR               | 251.959               | 1.716.319            | 441.114             | 266.625              | 27.741            |
| Maverick                | 2.187.699             | 1.402.756            | 266.487             | 1.342.717            | 0                 |
| Merlin                  | 0                     | 0                    | 0                   | 122.531              | 94.494            |
| Novosib                 | 0                     | 0                    | 0                   | 0                    | 82.199            |
| P                       | 467.516               | 442.149              | 411.688             | 765.209              | 555.234           |
| PIF-Harbinger           | 12.989.790            | 12.205.497           | 12.181.221          | 12.830.055           | 8.037.073         |
| PIF-ISL2EU              | 0                     | 235.589              | 464.262             | 1.597.340            | 914.106           |
| PiggyBac                | <b>3.844.887</b>      | 2.011.288            | <b>2.742.549</b>    | <b>3.776.961</b>     | 2.299.194         |
| Sola                    | 1.885.532             | 229.560              | 163.435             | 77.871               | 0                 |
| TcMar                   | 17.070                | 135.873              | 0                   | 185.840              | 137.413           |
| TcMar-Fot1              | 0                     | 30.498               | 0                   | 44.754               | 37.051            |
| TcMar-ISRm11            | 4.570.634             | 3.171.866            | 2.722.899           | 2.158.133            | 1.830.923         |
| TcMar-Stowaway          | 220.092               | 98.992               | 114.404             | 65.697               | 0                 |
| TcMar-Tc1               | 15.259.371            | 12.137.252           | 12.302.578          | 6.557.230            | 10.225.920        |
| TcMar-Tc2               | 627.258               | 465.068              | 299.455             | 227.802              | 468.716           |
| Zator                   | 0                     | 119.597              | 0                   | 0                    | 0                 |
| Zisupton                | 30.281                | 0                    | 127.852             | 0                    | 104.202           |

|                     |                   |                   |                   |                   |                  |
|---------------------|-------------------|-------------------|-------------------|-------------------|------------------|
| Zisupton-hAT-hybrid | 0                 | 0                 | 0                 | 0                 | 339.346          |
| hAT                 | <b>9.251.059</b>  | 7.244.672         | <b>9.113.922</b>  | <b>8.460.295</b>  | 6.356.798        |
| hAT-Ac              | 26.161.464        | 27.815.352        | 29.153.525        | 30.578.355        | 27.361.032       |
| hAT-Blackjack       | 1.252.051         | 459.611           | 338.327           | 514.383           | 437.930          |
| hAT-Charlie         | <b>7.578.170</b>  | 5.645.728         | <b>8.825.006</b>  | <b>5.557.301</b>  | 3.893.733        |
| hAT-Tip100          | 3.892.297         | 2.083.169         | 5.060.148         | 2.183.415         | 2.136.454        |
| hAT-Tol2            | 7.383.933         | 7.130.470         | 10.507.431        | 6.788.875         | 4.948.115        |
| hAT-hAT5            | 1.008.628         | 1.141.196         | 1.066.203         | 873.439           | 560.575          |
| hAT-hAT6            | 153.938           | 129.767           | 0                 | 0                 | 37.338           |
| hAT-hobo            | 693.242           | 589.992           | 435.263           | 245.056           | 840.680          |
| LINE                | 253.345           | 0                 | 0                 | 135.963           | 162.701          |
| CR1                 | 61.557            | 52.996            | 46.593            | 68.770            | 58.461           |
| Dong-R4             | 0                 | 161.938           | 0                 | 0                 | 0                |
| I                   | 902.480           | 1.009.950         | 1.721.862         | 451.473           | 448.921          |
| I-Nimb              | 187.474           | 66.650            | 179.364           | 0                 | 89.737           |
| Jockey              | 1.281.097         | 0                 | 0                 | 249.376           | 0                |
| L1                  | 3.161.932         | 2.720.443         | 3.146.061         | 3.530.190         | 3.456.430        |
| L1-Tx1              | 1.332.071         | 707.047           | 492.758           | 1.328.940         | 247.067          |
| L2                  | <b>24.295.832</b> | 18.778.236        | <b>18.931.729</b> | <b>15.671.956</b> | 10.981.470       |
| Penelope            | 696.540           | 651.596           | 168.974           | 978.870           | 436.687          |
| Proto2              | 432.031           | 406.555           | 335.607           | 288.595           | 210.869          |
| R1                  | 0                 | 0                 | 0                 | 146.213           | 277.081          |
| R2-Hero             | 258.797           | 37.021            | 152.400           | 101.778           | 204.860          |
| R2-NeSL             | 139.492           | 0                 | 191.055           | 106.574           | 62.871           |
| RTE                 | 1.012.896         | 0                 | 0                 | 0                 | 0                |
| RTE-BovB            | 3.915.100         | <b>11.058.368</b> | 4.053.280         | 5.607.772         | <b>8.522.404</b> |
| RTE-RTE             | 0                 | 0                 | 0                 | 169.573           | 0                |
| RTE-RTEX            | 0                 | 26.699            | 19.406            | 32.367            | 0                |
| RTE-X               | 738.450           | 801.862           | 1.308.994         | 1.325.349         | 418.476          |
| Rex-Babar           | <b>8.447.394</b>  | 7.183.710         | <b>11.161.891</b> | <b>7.936.953</b>  | 5.965.113        |
| Tad1                | 0                 | 0                 | 0                 | 138.056           | 320.275          |
| LTR                 | 569.316           | 146.042           | 61.769            | 0                 | 0                |
| Copia               | 180.685           | 275.175           | 422.246           | 471.447           | 0                |

|                           |                    |                    |                    |                    |                    |
|---------------------------|--------------------|--------------------|--------------------|--------------------|--------------------|
| DIRS                      | 766.684            | 743.991            | 1.555.092          | 1.105.144          | 825.655            |
| ERV1                      | 750.875            | 1.123.315          | 980.225            | 1.469.763          | 126.774            |
| ERVK                      | 659.689            | 486.486            | 0                  | 513.490            | 3.133.108          |
| Gypsy                     | 2.510.567          | 2.056.070          | 3.675.723          | 2.213.161          | 1.672.149          |
| Ngaro                     | 980.001            | 3.390.987          | 850.690            | 768.211            | 292.619            |
| Pao                       | 419.975            | 385.357            | 723.976            | 1.151.953          | 307.558            |
| RC                        | 0                  | 0                  | 0                  | 0                  | 0                  |
| Helitron                  | <b>6.307.248</b>   | 3.514.054          | <b>4.649.952</b>   | <b>5.159.806</b>   | 2.433.280          |
| Retroposon                | 213.419            | 116.255            | 421.490            | 238.385            | 0                  |
| SINE                      | 1.210.545          | 1.637.348          | 1.401.793          | 1.524.037          | 936.353            |
| 5S-Deu-L2                 | 721.151            | 965.222            | 838.622            | 0                  | 873.243            |
| ID                        | 0                  | 0                  | 19.012             | 29.728             | 116.970            |
| MIR                       | 1.185.268          | 1.020.008          | 1.163.355          | 2.103.257          | 382.739            |
| tRNA                      | 3.640.638          | 3.701.722          | 3.698.003          | 3.271.022          | 3.693.238          |
| tRNA-Core                 | 0                  | 0                  | 0                  | 0                  | 293.857            |
| tRNA-Core-L2              | 0                  | 0                  | 0                  | 89.805             | 106.872            |
| tRNA-Deu-L2               | 0                  | 0                  | 0                  | 42.616             | 0                  |
| tRNA-L2                   | 461.844            | 0                  | 103.308            | 223.271            | 301.117            |
| tRNA-V                    | 0                  | 0                  | 492.471            | 0                  | 0                  |
| Unknown                   | 149.784.304        | 121.893.498        | 134.020.433        | 144.621.637        | 113.225.894        |
| <b>total interspersed</b> | <b>354.992.667</b> | <b>305.241.677</b> | <b>326.860.083</b> | <b>319.430.101</b> | <b>255.255.533</b> |
| Low_complexity            | 2.964.797          | 2.285.494          | 2.321.578          | 2.478.451          | 2.097.985          |
| Satellite                 | 700.110            | 1.425.777          | 1.023.206          | 656.699            | 1.718.620          |
| Simple_repeat             | 30.391.090         | 32.172.324         | 29.527.186         | 34.124.020         | 27.469.062         |
| rRNA                      | 358.199            | 351.617            | 313.179            | 42.963             | 708.978            |
| snRNA                     | 0                  | 0                  | 0                  | 9.265              | 0                  |
| <b>Total</b>              | <b>389.406.863</b> | <b>341.476.889</b> | <b>360.045.232</b> | <b>356.741.499</b> | <b>287.250.178</b> |

680

681
